# Supplementary material for: High-resolution analysis of HLA class I alterations in colorectal cancer
Source: PubMed Central journal article supplement (PMC1599746; doi:10.1186/1471-2407-6-233), 2006-10-02
Supplement: 1471-2407-6-233-S1.pdf [file 1471-2407-6-233-S1.pdf]

| case | clinicopathology |     |      |       |     | MMR |      |      | FCM    | HLA FCM - expression values |       |      |       |      |      | HLA IHC |      |     |
|------|------------------|-----|------|-------|-----|-----|------|------|--------|-----------------------------|-------|------|-------|------|------|---------|------|-----|
|      | age              | sex | loc. | Dukes | F-U | MSI | MLH1 | PMS2 | ploidy | A.1                         | A.2   | B.1  | B.2   | HC   | B2M  | HCA2    | HC10 | B2M |
| 61   | 64               | F   | Ce   | C2    | DOD | S   | +    | +    | A      | 0,06                        |       | 0,70 | 0,14  | 1,86 | 2,41 | +       | - +  | - + |
| 63   | 57               | F   | Ce   | B2    | nr  | S   | +    | +    | D      | 0,16                        |       | 2,17 | 4,30  | 4,51 | 5,59 | - +     | - +  | - + |
| 109  | 68               | M   | A    | C2    | M   | S   | +    | +    | A      | 1,77                        |       | 0,16 | 1,13  | 1,47 | 1,90 | - +     | - +  | - + |
| 191  | 70               | M   | A    | C3    | nr  | H   | -    | -    | D      | 0,02                        | 4,21  | 0,30 | 0,47  | 1,52 | 1,56 | +       | - +  | +   |
| 55   | 74               | F   | Ce   | B2    | nr  | H   | -    | -    | M      | †                           | †     | †    | †     | 0,15 | 0,35 | -       | -    | C   |
| 56   | 75               | M   | Ce   | B3    | DND | H   | -    | -    | D      | 0,01                        | 0,05  | 0,20 | 0,01  | 0,40 | 0,28 | -       | -    | C   |
| 120  | 62               | F   | S    | B2    | nr  | H*  | +    | +    | D      | 0,01                        | 0,15  | 0,10 | 0,08  | 0,45 | 0,59 | -       | -    | C   |
| 179  | 90               | M   | Ce   | B2    | nr  | H   | -    | -    | D      | 0,07                        | 0,07† | 0,06 | 0,05  | 0,53 | 0,49 | -       | -    | C   |
| 40   | 81               | F   | R    | C3    | DOD | S   | +    | +    | A      | 2,37                        | 3,05  | 7,27 | >15   | 0,46 | 2,64 | +       | +    | - + |
| 43   | 50               | M   | R    | C2    | DOD | S   | +    | +    | M      | 10,71                       | 8,24  | 8,34 | 11,50 | 4,80 | 7,95 | +       | +    | +   |
| 44   | 57               | M   | S    | B2    | nr  | S   | +    | +    | A      | 9,72                        | 10,32 | 7,17 | 2,72  | 5,85 | 3,87 | - +     | - +  | +   |
| 45   | 64               | F   | RS   | A     | nr  | S   | +    | +    | D      | 2,91                        | 3,86  | 1,36 | 3,18  | 1,56 | 1,00 | - +     | - +  | - + |
| 48   | 66               | F   | S    | B2    | nr  | S   | +    | +    | D      | 5,65                        | 5,65† | 2,75 | 2,74  | 1,29 | 1,76 | - +     | - +  | - + |
| 58   | 53               | F   | D    | B2    | nr  | S   | +    | +    | M      | 1,10                        | 0,72  | 1,36 | 1,00  | 1,12 | 1,53 | - +     | - +  | - + |
| 59   | 56               | M   | R    | B1    | nr  | S   | +    | +    | D      | 2,15                        | 2,73  | 1,56 | 1,35  | 1,81 | 2,40 | - +     | - +  | - + |
| 69   | 74               | F   | A    | B2    | M   | S   | +    | +    | A      | 1,87                        | 2,34  | 1,28 | 0,90  | 1,90 | 2,20 | - +     | - +  | - + |
| 106  | 61               | F   | A    | C2    | M   | S   | +    | +    | M      | 1,41                        |       | 0,64 | 0,87  | 1,00 | 1,36 | +       | +    | - + |
| 108  | 52               | M   | A    | C2    | nr  | S   | +    | +    | M      | 1,37                        | 1,34  | 0,59 | 0,71  | 1,31 | 1,51 | - +     | - +  | - + |
| 110  | 74               | F   | S    | C2    | M   | S   | +    | +    | D      | 3,00                        | 4,53  | 1,53 | 1,86  | 2,81 | 4,46 | - +     | +    | - + |
| 122  | 55               | F   | S    | C2    | M   | S   | +    | +    | A      | 1,10                        | 2,54  | 1,37 | 1,22  | 1,16 | 1,73 | - +     | +    | - + |
| 124  | 75               | F   | Ce   | C1    | nr  | S   | +    | +    | A      | 5,13                        |       | 1,58 |       | 2,98 | 3,76 | - +     | - +  | - + |
